# Supplementary material
Source: PubMed Central journal article supplement (PMC8043991)
Supplement: NIHMS1642079-supplement-12015_2020_10063_MOESM1_ESM.pdf [file NIHMS1642079-supplement-12015_2020_10063_MOESM1_ESM.pdf]

**Supplementary Table 1. Exclusions**

|                                                     | <b>Vehicle</b> | <b>Single dose</b> | <b>Multiple doses</b> |
|-----------------------------------------------------|----------------|--------------------|-----------------------|
| <b>Initial enrollment of mice for MI studies</b>    | 112            |                    |                       |
| <b>Death after MI (all deaths were within 48 h)</b> | 21             |                    |                       |
| <b>Excluded because EF &gt;35%</b>                  | 13             |                    |                       |
| <b>Mice assigned to group</b>                       | 26             | 26                 | 26                    |
| <b>Death after 1st infusion</b>                     | 2              | 2                  | 3                     |
| <b>Death after 2nd infusion</b>                     | 0              | 0                  | 2                     |
| <b>Death after 3rd infusion</b>                     | 2              | 0                  | 1                     |
| <b>Total mice included in final analysis</b>        | 22             | 24                 | 20                    |

EF, ejection fraction; MI, myocardial infarction.

**Supplementary Table 2**

**A. Rectal Temperature and Heart Rate on the Day of Coronary Occlusion**

|                                      | Pre-Occlusion | Occlusion  |            |            | Reperfusion |            |            |
|--------------------------------------|---------------|------------|------------|------------|-------------|------------|------------|
|                                      |               | 10 min     | 30 min     | 60 min     | 1 min       | 5 min      | 10 min     |
| <b><u>Temperature (°C)</u></b>       |               |            |            |            |             |            |            |
| Vehicle                              | 37.1 ± 0.0    | 37.0 ± 0.1 | 37.1 ± 0.0 | 37.2 ± 0.0 | 37.1 ± 0.0  | 37.1 ± 0.0 | 37.1 ± 0.1 |
| Single dose                          | 37.1 ± 0.0    | 37.1 ± 0.1 | 37.1 ± 0.0 | 37.1 ± 0.0 | 37.1 ± 0.0  | 37.1 ± 0.0 | 37.1 ± 0.1 |
| Multiple doses                       | 37.1 ± 0.0    | 37.1 ± 0.0 | 37.1 ± 0.0 | 37.1 ± 0.1 | 37.1 ± 0.0  | 37.1 ± 0.1 | 37.1 ± 0.0 |
| <b><u>Heart rate (beats/min)</u></b> |               |            |            |            |             |            |            |
| Vehicle                              | 465 ± 9       | 447 ± 7    | 463 ± 10   | 492 ± 12   | 503 ± 10    | 525 ± 14   | 536 ± 14   |
| Single dose                          | 457 ± 8       | 450 ± 10   | 460 ± 11   | 480 ± 15   | 503 ± 15    | 510 ± 14   | 511 ± 15   |
| Multiple doses                       | 458 ± 8       | 447 ± 7    | 467 ± 11   | 498 ± 12   | 504 ± 8     | 515 ± 9    | 513 ± 14   |

A. Measurements of rectal temperature and heart rate were taken before the 60-min coronary occlusion (pre-occlusion), at 10, 30 and 60 min into the 60-min occlusion, and at 1, 5 and 10 min after reperfusion. Rectal temperature was continuously monitored and carefully controlled throughout the experiment, as detailed in the text. Data are means ± SEM.

**B. Rectal Temperature and Heart Rate on the Days of the Echocardiogram**

|                                      | Pre-Rx 1 (BSL) | Pre-Rx 2   | Pre-Rx 3   | Final Echo |
|--------------------------------------|----------------|------------|------------|------------|
| <b><u>Temperature (°C)</u></b>       |                |            |            |            |
| Vehicle                              | 37.4 ± 0.1     | 37.7 ± 0.1 | 37.7 ± 0.1 | 37.6 ± 0.1 |
| Single dose                          | 37.4 ± 0.1     | 37.8 ± 0.2 | 37.7 ± 0.1 | 37.5 ± 0.1 |
| Multiple doses                       | 37.2 ± 0.1     | 37.6 ± 0.1 | 37.6 ± 0.1 | 37.8 ± 0.1 |
| <b><u>Heart rate (beats/min)</u></b> |                |            |            |            |
| Vehicle                              | 519 ± 7        | 517 ± 10   | 548 ± 8    | 498 ± 9    |
| Single dose                          | 517 ± 9        | 528 ± 8    | 522 ± 8    | 494 ± 8    |
| Multiple doses                       | 506 ± 6        | 538 ± 12   | 549 ± 6    | 516 ± 10   |

B. Measurements of rectal temperature and heart rate were taken during the echocardiographic studies. First, second, and third Rx indicates first, second, and third treatment. Data are means ± SEM.

### Supplementary Table 3

#### A. Body Weight on the Days of Coronary Occlusion and Echocardiograms

|                         | Control<br>(n=6) | Vehicle<br>(n=22) | Single dose<br>(n=24)   | Multiple doses<br>(n=20) |
|-------------------------|------------------|-------------------|-------------------------|--------------------------|
| <b>Body weight(g)</b>   |                  |                   |                         |                          |
| Day of Occlusion        |                  | 21.9 ± 0.2        | 22.0 ± 0.3              | 22.9 ± 0.3 <sup>#</sup>  |
| Pre-Rx 1 (BSL)          |                  | 25.4 ± 0.4        | 24.5 ± 0.4              | 25.8 ± 0.4               |
| Pre-Rx 2                |                  | 25.5 ± 0.3        | 25.0 ± 0.4              | 26.0 ± 0.4               |
| Pre-Rx 3                |                  | 25.7 ± 0.4        | 25.4 ± 0.3              | 25.2 ± 0.4               |
| Final Echo/Sacrifice    | 24.8 ± 0.7       | 24.1 ± 0.5        | 24.8 ± 0.4              | 26.2 ± 0.3 <sup>#</sup>  |
| <b>Δ Body Weight(g)</b> |                  |                   |                         |                          |
| Final-Pre-Rx 1          |                  | -1.3 ± 0.7        | 0.3 ± 0.4               | 0.4 ± 0.3 <sup>#</sup>   |
| Final-Pre-Rx 2          |                  | -1.3 ± 0.5        | -0.1 ± 0.3 <sup>#</sup> | 0.2 ± 0.3 <sup>#</sup>   |
| Final-Pre-Rx 3          |                  | -1.6 ± 0.5        | -0.6 ± 0.3              | 1.0 ± 0.3 <sup>#*</sup>  |

Measurements of body weight taken on the day of 60-minute coronary occlusion and on the day of each echocardiographic study. Echocardiograms were performed prior to the first treatment (3 months after 60-minute coronary occlusion), and 5 weeks after each treatment. Rx, treatment. <sup>#</sup> P<0.05 vs. Vehicle; \* P<0.05 vs. Single dose. Data are means ± SEM.

#### B. Morphometric Measurements

|                                  | Normal<br>control (n=6)  | Vehicle<br>(n=10) | Single<br>dose<br>(n=11) | Multiple<br>doses<br>(n=10) |
|----------------------------------|--------------------------|-------------------|--------------------------|-----------------------------|
| LV Mass (mg)                     | 105.1 ± 7.5 <sup>#</sup> | 141.7 ± 8.3       | 117.1 ± 5.7 <sup>#</sup> | 109.8 ± 3.1                 |
| LV Mass/Body Weight (mg/g)       | 4.3 ± 0.4 <sup>#</sup>   | 5.8 ± 0.3         | 4.9 ± 0.3                | 4.2 ± 0.1 <sup>#</sup>      |
| LV Mass/Tibia Length (mg/mm)     | 5.7 ± 0.4 <sup>#</sup>   | 8.0 ± 0.4         | 6.4 ± 0.3 <sup>#</sup>   | 6.0 ± 0.2 <sup>#</sup>      |
| Lung weight/Body Weight (mg/g)   | 6.7 ± 0.1                | 7.1 ± 0.2         | 7.4 ± 0.3                | 6.6 ± 0.2                   |
| Lung weight/Tibia Length (mg/mm) | 9.1 ± 0.3                | 9.6 ± 0.2         | 9.7 ± 0.4                | 9.5 ± 0.2                   |

LV mass, body weight, tibia length, and lung weight. <sup>#</sup> P<0.05 vs. Vehicle. Data are means ± SEM.

#### C. Temperature and Heart Rate on the Day of the Hemodynamics Study

|                | Temperature (°C) | Heart rate<br>(beats/min) |
|----------------|------------------|---------------------------|
| Vehicle        | 37.1 ± 0.1       | 461 ± 10                  |
| Single dose    | 37.0 ± 0.2       | 439 ± 8                   |
| Multiple doses | 37.1 ± 0.1       | 467 ± 12                  |

Measurements of rectal temperature and heart rate were taken 30 min after LV catheterization during hemodynamics studies. Data are means ± SEM.
